# Supplementary material for: Cecal CircRNAs Are Associated With the Response to Salmonella Enterica Serovar Enteritidis Inoculation in the Chicken
Source: Front Immunol. 2019 May 31;10:1186. doi: 10.3389/fimmu.2019.01186 (PMC6554294; doi:10.3389/fimmu.2019.01186)
Supplement: Supplementary File 2 — Information of the significantly differentially expressed circRNAs. [file Table_2.XLSX]

## Sheet: SDE circRNAs
#ID	Chromosome	log2FC(T/C)	regulation	circRNA_type
NC_006088.4:940142|942359	Chr1:940142-942359	Inf	up	exon
NC_006088.4:40948513|40949083	Chr1:40948513-40949083	4.5257	up	exon
NC_006088.4:45074115|45077641	Chr1:45074115-45077641	4.79986	up	exon
NC_006088.4:49213129|49217512	Chr1:49213129-49217512	-1.40042	down	exon
NC_006088.4:88256232|88268179	Chr1:88256232-88268179	Inf	up	exon
NC_006088.4:130318781|130337364	Chr1:130318781-130337364	1.92964	up	exon
NC_006088.4:132593578|132598993	Chr1:132593578-132598993	-4.1188	down	exon
NC_006088.4:137495195|137497059	Chr1:137495195-137497059	3.16519	up	exon
NC_006089.4:4004685|4012446	Chr2:4004685-4012446	3.45282	up	exon
NC_006089.4:32287526|32298108	Chr2:32287526-32298108	3.84366	up	exon
NC_006089.4:50073627|50074232	Chr2:50073627-50074232	Inf	up	exon
NC_006089.4:59788974|59793364	Chr2:59788974-59793364	1.7375	up	exon
NC_006089.4:75739474|75744290	Chr2:75739474-75744290	uniquely expressed in C group	down	intron
NC_006089.4:98710927|98738164	Chr2:98710927-98738164	3.67116	up	exon
NC_006089.4:103286195|103303648	Chr2:103286195-103303648	Inf	up	exon
NC_006089.4:138244398|138244878	Chr2:138244398-138244878	-1.65133	down	exon
NC_006090.4:3277796|3278805	Chr3:3277796-3278805	uniquely expressed in C group	down	exon
NC_006090.4:4071590|4085456	Chr3:4071590-4085456	-2.44465	down	exon
NC_006090.4:37447248|37463414	Chr3:37447248-37463414	uniquely expressed in C group	down	exon
NC_006090.4:37563382|37575283	Chr3:37563382-37575283	-1.60588	down	exon
NC_006090.4:41254907|41255931	Chr3:41254907-41255931	-2.18798	down	exon
NC_006090.4:67968245|67984173	Chr3:67968245-67984173	-3.94435	down	exon
NC_006090.4:105203303|105209885	Chr3:105203303-105209885	Inf	up	exon
NC_006091.4:33266075|33268960	Chr4:33266075-33268960	1.23034	up	exon
NC_006091.4:37828602|37875649	Chr4:37828602-37875649	-2.39798	down	exon
NC_006091.4:65510578|65515090	Chr4:65510578-65515090	2.19771	up	exon
NC_006091.4:77018109|77020992	Chr4:77018109-77020992	3.11346	up	exon
NC_006091.4:85242844|85243792	Chr4:85242844-85243792	Inf	up	intergenic_region
NC_006092.4:18049833|18051645	Chr5;18049833-18051645	-2.40202	down	exon
NC_006092.4:28143580|28167808	Chr5;28143580-28167808	1.72278	up	exon
NC_006092.4:28738500|28747257	Chr5;28738500-28747257	Inf	up	exon
NC_006092.4:52223625|52231585	Chr5;52223625-52231585	-2.93114	down	exon
NC_006093.4:15644561|15656042	Chr6;15644561-15656042	-1.96917	down	exon
NC_006093.4:22336800|22337063	Chr6;22336800-22337063	-1.46331	down	exon
NC_006094.4:22760849|22761278	Chr7;22760849-22761278	-1.17287	down	exon
NC_006094.4:31198531|31200120	Chr7;31198531-31200120	-3.04792	down	exon
NC_006094.4:35336503|35337979	Chr7;35336503-35337979	4.79175	up	exon
NC_006095.4:3811366|3812181	Chr8:3811366-3812181	uniquely expressed in C group	down	exon
NC_006096.4:3580881|3595533	Chr9:3580881-3595533	-1.81348	down	exon
NC_006096.4:10814512|10838667	Chr9:10814512-10838667	Inf	up	intron
NC_006097.4:1032405|1037978	Chr10:1032405-1037978	-3.27436	down	exon
NC_006097.4:4115091|4116820	Chr10:4115091-4116820	-1.3898	down	exon
NC_006097.4:7556544|7561000	Chr10:7556544-7561000	2.85175	up	exon
NC_006099.4:15993284|16006290	Chr12:15993284-16006290	2.19805	up	exon
NC_006099.4:16132825|16236906	Chr12:16132825-16236906	-1.10253	down	exon
NC_006099.4:16754715|16756055	Chr12:16754715-16756055	-3.10174	down	exon
NC_006100.4:988760|1005285	Chr13:988760-1005285	1.54639	up	exon
NC_006100.4:10221676|10223839	Chr13:10221676-10223839	-2.37456	down	exon
NC_006100.4:16607637|16648476	Chr13:16607637-16648476	2.9825	up	exon
NC_006101.4:9981009|9981624	Chr14:9981009-9981624	-1.95277	down	intron
NC_006103.4:242878|309387	Chr16:242878-309387	-3.32849	down	intergenic_region
NC_006104.4:9574807|9612538	Chr17:9574807-9612538	1.9067	up	exon
NC_006107.4:13405791|13406817	Chr20:13405791-13406817	Inf	up	exon
NC_006111.4:378329|378963	Chr24:378329-378963	2.28088	up	exon
NC_006113.4:76490|78365	Chr26:76490-78365	-1.74765	down	exon
NC_006113.4:2252690|2258010	Chr26:2252690-2258010	4.5597	up	intergenic_region
NC_006113.4:2670958|2679178	Chr26:2670958-2679178	1.48785	up	intergenic_region
NC_006115.4:3194855|3195107	Chr28:3194855-3195107	-4.06157	down	exon
NC_006126.4:4993157|4993440	W;4993157-4993440	-1.35051	down	exon
NC_006127.4:9214790|9215336	Z;9214790-9215336	-1.34534	down	exon
NC_006127.4:11041710|11042976	Z;11041710-11042976	-1.55793	down	exon
NT_463443.1:31055|31299	——	-2.44496	down	exon
